# Supplementary material
Source: publisher figshare collection journal article supplement (https://frontiersin.figshare.com/ndownloader/files/26513471)
Supplement: Supplementary file [file 26513471]

(A)

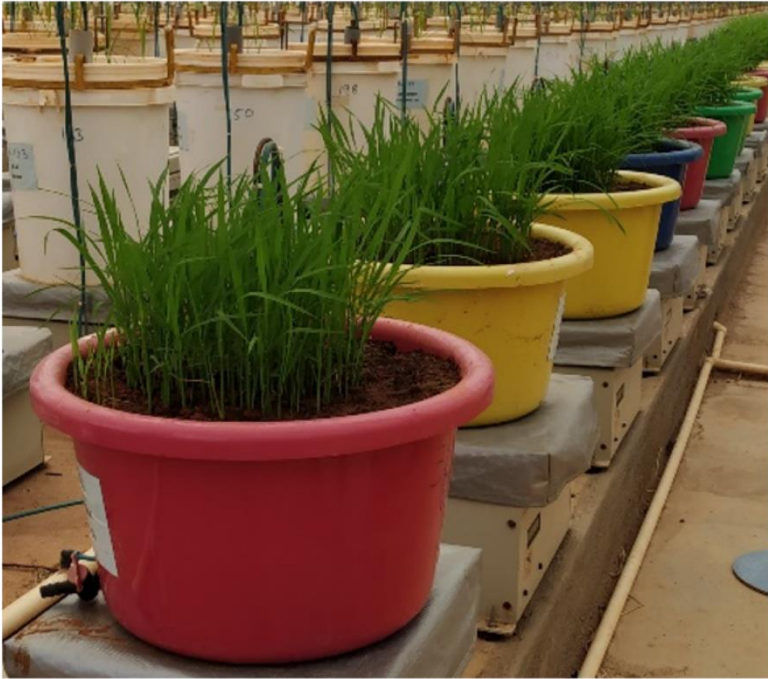

(B)

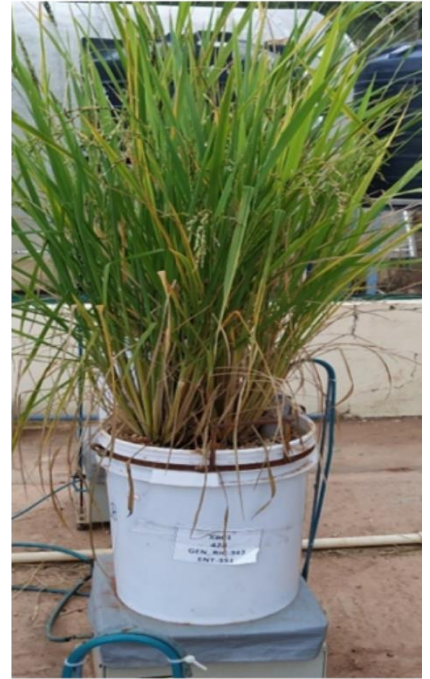

(C)

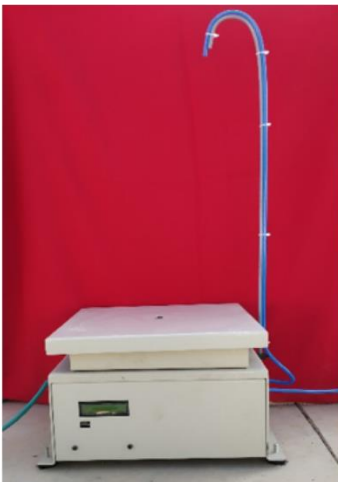

(D)

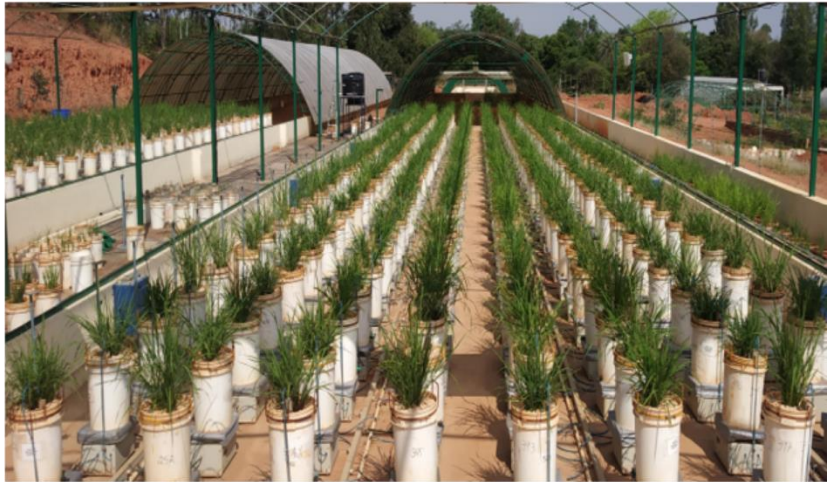

**Figure S1:** Minilysimeter (MLM) based drought-simulator platform for stress imposition protocol in rice. (A) Experiment 1 with 10 L capacity pots for protocol standardization during the seedling stage and (B) pots of 20 L capacity for inducing gradual stress in 17 genotypes were placed on lysimeters with the automated irrigation facility. (C) Load cell balance platform along with an irrigation pipe. (D) Overall view of the drought-simulator phenomics facility at University of Agricultural Sciences, Bangalore, India.

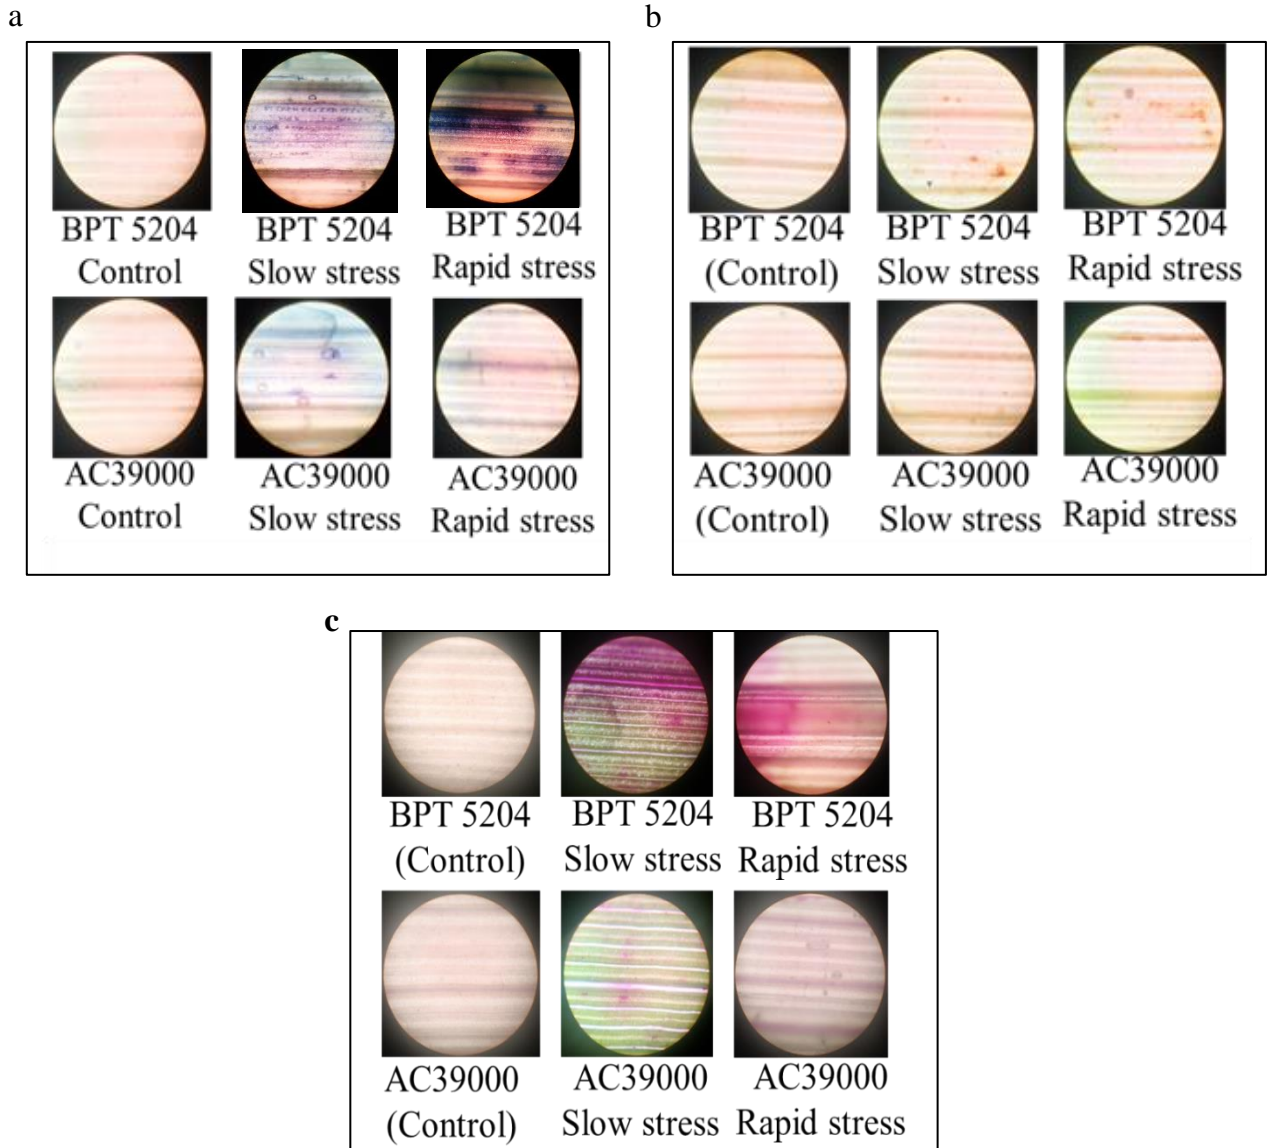

**Figure S2:** Visualization of oxidative stress biomarkers production in two rice genotypes, BPT 5204, and AC 39000 under control, gradual stress (GS), and rapid stress (RS): ROS production in terms of (a) superoxide content using NBT staining assay and (b) hydrogen peroxide content using DAB staining. (c) RCCs production using schiff base staining assay.

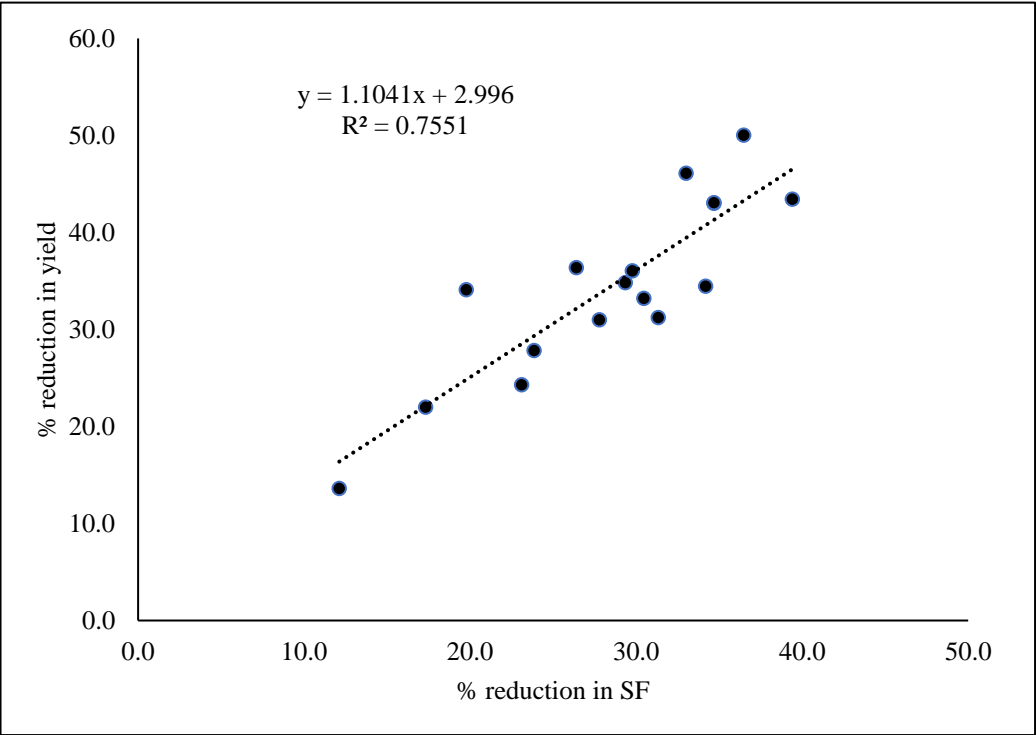

**Figure S3:** Correlation graph between percent reduction in yield and spikelet fertility (SF) in 17 germplasm lines.
